# Supplementary material for: Further Understanding of Degradation Pathways of Microcystin-LR by an Indigenous Sphingopyxis sp. in Environmentally Relevant Pollution Concentrations
Source: PubMed Central journal article supplement (PMC6315713; doi:10.3390/toxins10120536), 2018-12-14
Supplement: toxins-10-00536-s001.pdf [file toxins-10-00536-s001.pdf]

# Supplementary Materials: Further Understanding of Degradation Pathways of Microcystin-LR by an Indigenous *Shingopyxis* sp. in Environmentally Relevant Pollution Concentrations

Qin Ding, Kaiyan Liu, Kai Xu, Rongli Sun, Juan Zhang, Lihong Yin, and Yuepu Pu

Table S1. Specific primers sequences.

| Primers             | Sequence (5' to 3')   |
|---------------------|-----------------------|
| <i>mlrA</i> -F      | GACCCGATGTTCAAGATACT  |
| <i>mlrA</i> -R      | CTCCTCCCACAAATCAGGAC  |
| <i>mlrB</i> -F      | CTCGATGCGGTATTTGCTG   |
| <i>mlrB</i> -R      | TCCAACGACCATCCCTTCTG  |
| <i>mlrC</i> -F      | CGAAGGCGAAAGGTGCAAC   |
| <i>mlrC</i> -R      | GAGCGCTTGTGATAGTGACG  |
| <i>mlrD</i> -F      | GTTCTCGGCCTAGCCT      |
| <i>mlrD</i> -R      | GCGACGAAGATCGTTGCT    |
| 16S-F-real          | AGGATGAGCCCGCGTAAGAT  |
| 16S-R-real          | TCAGTCCCAGTGTGGCTGATC |
| <i>mlrA</i> -F-real | GCACCATCATCGCTGTCTT   |
| <i>mlrA</i> -R-real | ACCGTTGGAGCCCATTCCG   |
| <i>mlrB</i> -F-real | CTATCAGGGCGGCTTTGGA   |
| <i>mlrB</i> -R-real | GAGAGCGGCCGTGAACTG    |
| <i>mlrC</i> -F-real | CAGCGTCGATCGCACAAAG   |
| <i>mlrC</i> -R-real | CGCTCTGGGCCGTTACC     |
| <i>mlrD</i> -F-real | ACGCCATCTTCTGCCTCC    |
| <i>mlrD</i> -R-real | CGACCCGCAAGACGATTA    |

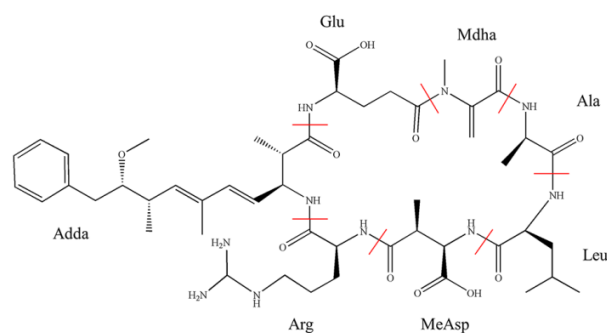

Figure S1. Chemical structure of MC-LR, cyclo-(Ala-Leu-MeAsp-Arg-Adda-Glu-Mdha).

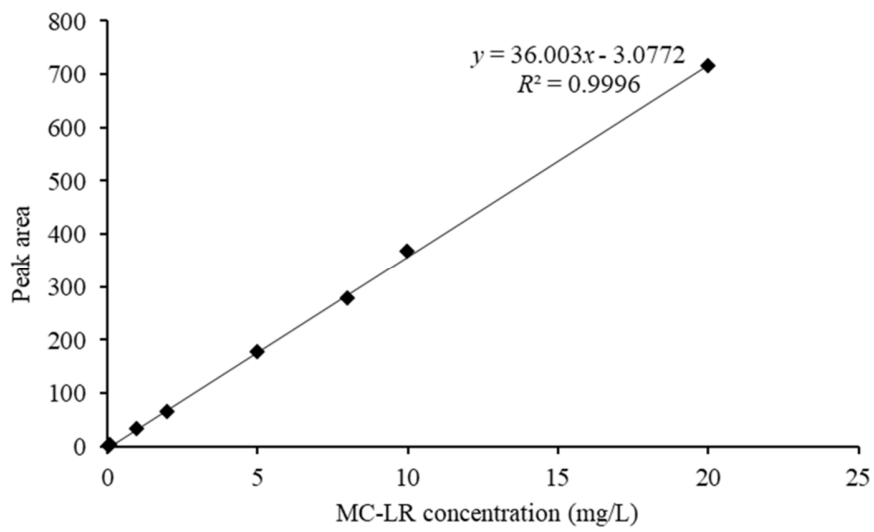

**Figure S2.** The standard curve of MC-LR quantitated by HPLC (50 µg/L–20 mg/L).

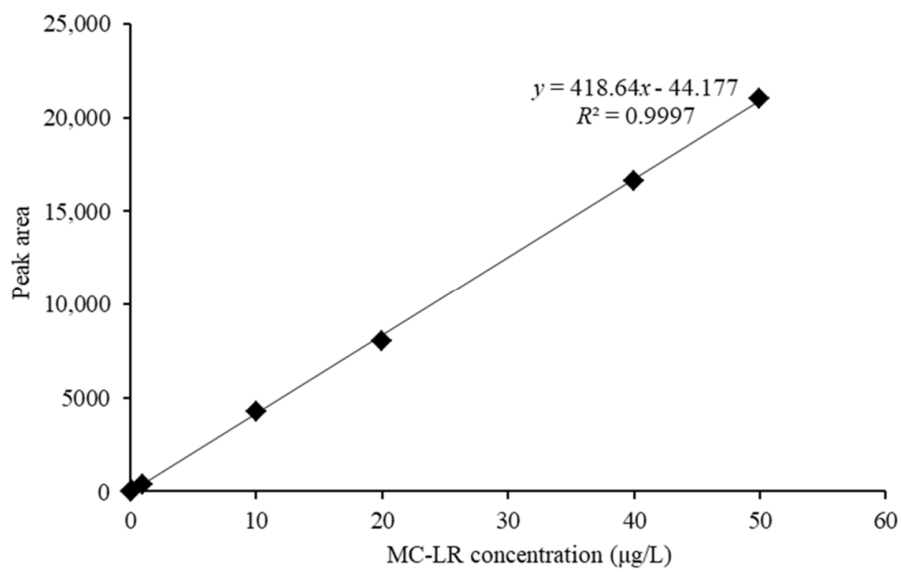

**Figure S3.** The standard curve of MC-LR quantitated by UPLC-MS/MS (0.01 µg/L–50µg/L).

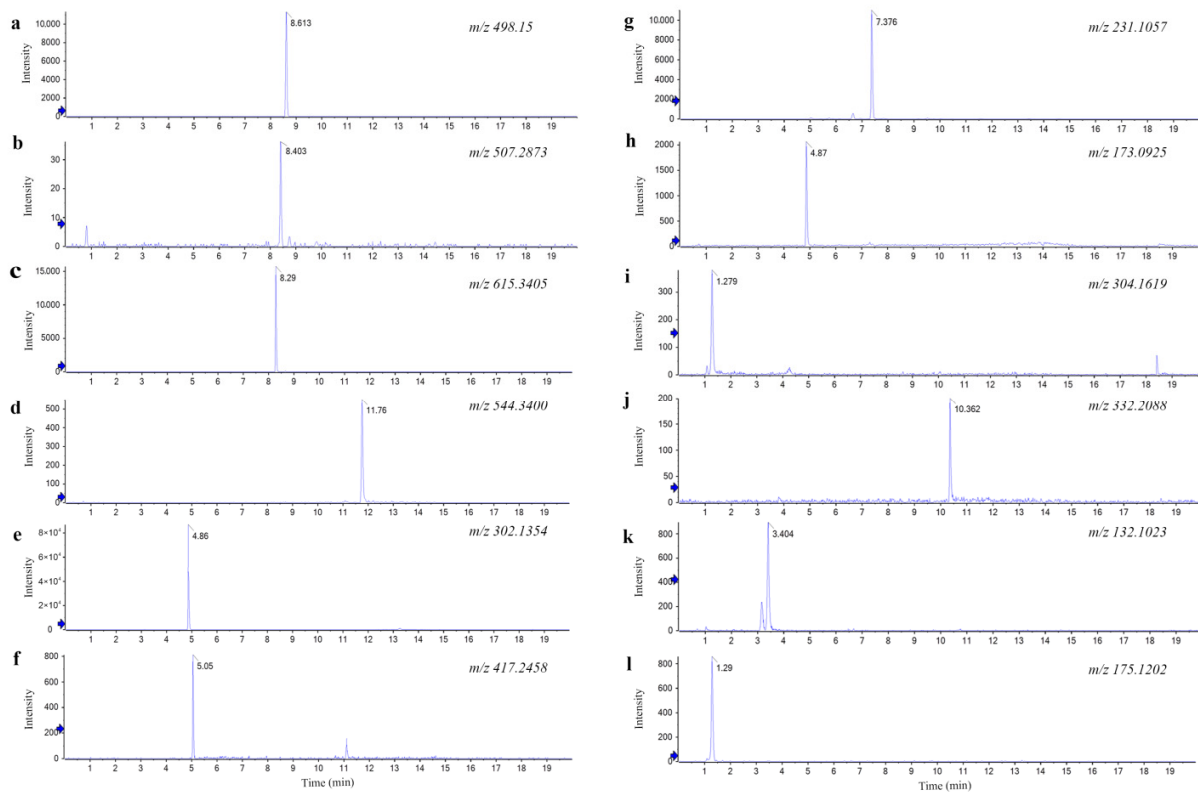

**Figure S4.** Chromatograms of MC-LR and its degradation products (a) MC-LR, (b) linearized MC-LR, (c) tetrapeptide, (d) Adda-Glu-Mdha, (e) Glu-Mdha-Ala, (f) Leu-MeAsp-Arg, (g) Glu-Mdha, (h) Mdha-Ala, (i) MeAsp-Arg, (j) Adda, (k) Leu, (l) Arg.

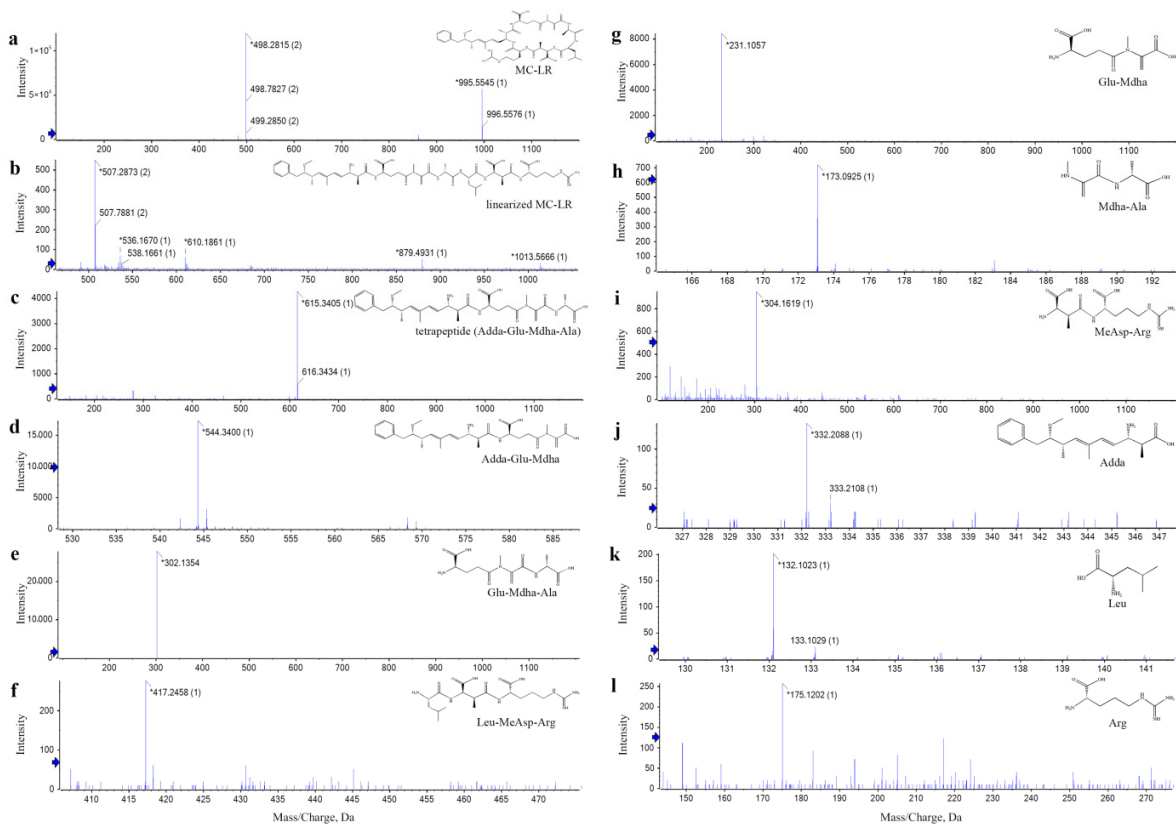

**Figure S5.** Mass spectrum of MC-LR and its degradation products (a) MC-LR, (b) linearized MC-LR, (c) tetrapeptide, (d) Adda-Glu-Mdha, (e) Glu-Mdha-Ala, (f) Leu-MeAsp-Arg, (g) Glu-Mdha, (h) Mdha-Ala, (i) MeAsp-Arg, (j) Adda, (k) Leu, (l) Arg.

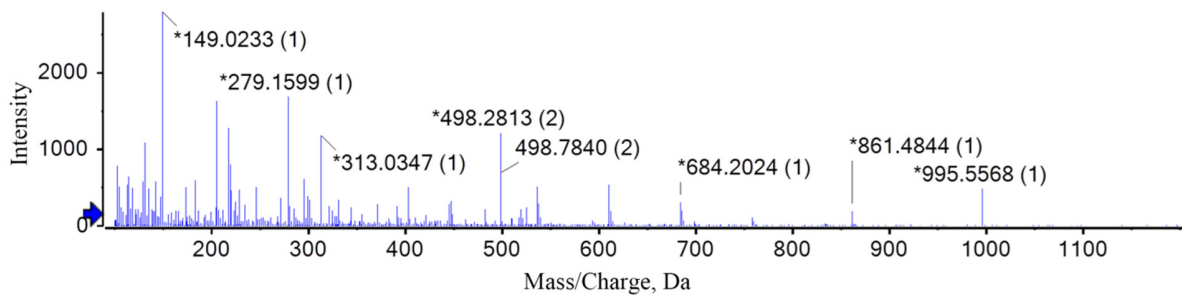

**Figure S6.** Fragment ions of standard MC-LR detected by UPLC-MS/MS.
